# Supplementary material for: HDAC9 Variant Rs2107595 Modifies Susceptibility to Coronary Artery Disease and the Severity of Coronary Atherosclerosis in a Chinese Han Population
Source: PLoS One. 2016 Aug 5;11(8):e0160449. doi: 10.1371/journal.pone.0160449 (PMC4975504; doi:10.1371/journal.pone.0160449)
Supplement: S2 Dataset — (XLSX) [file pone.0160449.s003.xlsx]

## Sheet: Control (Replication set)
ID	rs2107595	Age	Sex (1=Male, 2=Female)	BMI	Smoking (1=No, 2=Yes)	Drinking (1=No, 2=Yes)	Hypertension (1=No, 2=Yes)	T2DM (1=No, 2=Yes)	Hyperlipidemia (1=No, 2=Yes)	Plasma HDAC9 (ng/mL)	HDAC9 mRNA expression (leukocytes)
12	A G	2	63	27.76	2	1	2	1	2	54.3	1.33
17	G G	2	67	19.32	1	2	2	1	1	61.8	0.88
19	G G	2	70	20.98	1	2	1	2	1	43.61	0.81
28	A A	1	60	25.56	2	2	1	2	1	66.42	0.98
29	G G	1	88	23.91	1	1	2	2	1	47.57	0.98
40	A G	2	68	23.15	1	1	1	1	1	35.91	1.12
44	G G	1	84	29.65	1	2	2	2	1	44.35	0.97
46	G G	1	81	21.08	2	2	2	2	2	41.57	1.83
47	G G	1	49	21.86	2	1	1	1	1	41.38	1.04
51	G G	1	66	22.28	1	2	2	1	1	48.21	0.99
55	A G	1	61	23.36	2	1	2	1	1	48.34	1.15
58	A A	2	46	22.09	1	1	1	1	1	61.32	1.23
62	A G	2	54	23.17	2	1	1	1	1	48.97	0.6
63	G G	1	65	21.39	1	1	1	1	2	44.89	1.77
71	G G	2	55	20.72	1	1	2	2	1	60.81	1.01
72	G G	1	82	25.79	1	2	1	1	2	60.94	1.32
74	A G	1	71	24.32	1	1	1	1	1	55.56	1.64
78	A G	2	47	26.85	1	1	1	1	2	52.83	1.5
84	G G	2	79	23.21	1	1	1	2	2	39.45	0.7
87	G G	1	65	24.5	2	1	2	1	2	64.84	0.62
90	A G	2	68	25.69	1	1	2	2	1	56.99	0.52
91	A G	1	64	25.35	2	2	2	1	2	42.88	1.3
98	A G	1	63	26.13	1	1	2	1	2	39.17	1.88
100	A G	1	56	24.49	1	2	2	2	1	48.2	1.32
113	G G	1	60	28.49	1	1	1	1	1	42.02	0.63
119	G G	1	68	25.88	1	2	2	2	1	44.18	0.67
142	G G	1	45	24.48	1	1	2	1	1	45.84	1.36
149	G G	1	67	25	1	2	1	1	1	42.57	0.62
158	G G	1	57	23.66	1	1	1	1	1	41.44	0.57
166	A G	2	61	25.76	1	1	2	1	1	62.98	1.7
169	A G	1	53	25.54	2	2	2	2	1	56.17	1.72
188	A G	1	59	26.61	1	1	1	1	1	61.01	1.08
190	G G	2	49	26.03	1	1	2	1	1	42.44	0.98
208	G G	1	60	25.53	2	1	2	2	1	62.38	1.15
273	G G	2	61	30.96	1	1	1	1	2	48.06	1.12
278	G G	1	60	26.55	1	1	1	1	1	46.02	0.7
281	G G	1	70	23.16	1	1	1	1	1	61.2	0.83
294	A G	1	53	24.15	1	2	1	2	2	55.56	1.31
308	G G	2	75	21.07	1	2	2	1	2	35.26	1
310	A A	2	80	30.96	1	1	1	1	1	63.73	1.48
315	G G	1	64	24.76	1	1	1	1	1	42.88	1.72
320	G G	1	79	22.59	1	1	1	1	2	48.03	1.8
327	A G	2	74	23.18	1	1	1	2	1	48.69	0.62
333	A G	1	68	22.73	1	1	1	1	1	59.68	0.56
339	G G	1	58	27.01	1	1	1	1	1	52.97	0.85
342	A G	1	63	23.74	1	1	1	2	1	61.32	0.69
343	A G	1	80	24.45	1	1	1	2	1	37.68	1.01
344	A A	1	45	24.85	1	1	2	1	1	43.33	0.79
352	A A	1	63	22.62	1	1	1	1	2	57.07	1.09
353	A A	2	65	20.98	1	1	2	2	1	59.98	0.91
355	A A	2	65	24.18	2	2	1	2	2	60.62	1.31
356	A G	2	53	24.26	1	1	1	1	1	52.83	1.1
357	G G	1	72	25.36	2	1	2	1	1	44.86	1.12
360	A G	2	51	24.72	1	1	2	1	1	65.19	0.59
361	A G	2	62	26.32	2	1	1	1	1	58.08	1.62
362	G G	1	58	25	2	1	1	1	1	63.85	0.9
363	G G	2	45	22.79	2	1	2	1	1	40.11	0.76
365	G G	2	55	23.62	2	1	1	1	1	47.76	1.48
367	A A	1	54	25.15	1	1	1	1	1	57.5	1.64
368	G G	2	45	24.22	1	1	1	1	1	55.49	0.95
370	A G	2	85	27.1	2	1	2	1	2	39.95	1.36
382	G G	2	73	24.97	2	2	2	2	1	57.53	0.56
384	A G	2	65	26.44	1	2	1	1	1	41.73	0.87
392	G G	1	65	21.66	2	1	1	2	1	47.75	1.12
406	G G	2	62	22.59	2	1	1	1	1	57.17	0.88
408	G G	1	46	26.57	1	1	2	1	1	41.71	1.06
418	G G	1	67	22.62	1	1	1	1	1	41.89	0.98
419	G G	1	58	25.79	1	1	2	1	1	40.34	0.63
420	G G	1	52	22.76	1	1	1	1	1	41.1	0.63
423	G G	2	61	21.87	1	1	2	1	1	41.35	1.14
438	G G	1	61	23.77	1	2	2	1	1	49.08	0.57
445	A A	2	58	24.04	1	1	2	1	1	43.4	0.88
461	A A	1	80	23.68	1	1	1	2	1	53.34	0.89
465	G G	1	56	21.21	1	1	1	1	1	63.28	1.15
467	A G	2	61	21.92	1	1	1	1	2	46.84	0.94
487	A G	1	54	23.15	1	2	1	1	1	44.78	0.99
565	G G	1	62	27.2	1	1	1	1	1	47.75	0.66
570	A G	1	58	24.09	1	2	2	1	1	62.28	0.77
572	G G	2	55	22.21	1	1	2	1	2	44.51	0.53
573	A A	2	49	23.15	1	1	1	1	1	56.56	1.51
590	A G	1	67	22.18	1	1	1	2	1	35.87	1.12
607	A G	2	68	20.46	1	1	2	1	1	62.44	1.06
610	G G	1	62	19.27	1	1	1	1	1	49.64	0.9
642	A G	1	66	24.48	2	2	1	1	1	42.79	0.84
653	A G	2	82	22.55	1	2	1	1	1	60.58	0.54
658	G G	1	66	22.46	1	2	1	1	1	43.21	0.85
712	A G	2	66	21.69	2	1	1	2	1	49.26	1.91
714	A G	2	53	22.01	1	1	2	1	2	56.54	0.67
717	G G	2	53	21.68	1	1	1	1	1	50.7	0.59
719	A G	1	78	21.25	2	1	1	2	2	65.34	0.93
720	A G	2	48	24.22	1	1	2	1	1	41.61	0.92
722	G G	2	56	25.53	1	2	1	1	1	38.7	1.42
728	G G	1	64	26.47	1	1	1	1	1	47.38	0.73
795	A A	2	53	24.15	1	2	1	1	2	54.28	0.69
827	G G	1	83	24.66	1	1	1	1	1	40.93	0.52
893	G G	1	58	21.8	2	1	1	2	1	46.08	1.53
895	G G	1	59	21.51	1	1	1	1	2	41.3	1.27
899	A A	1	66	23.27	1	1	2	1	2	54.19	1.82
900	A A	1	67	24.54	2	1	1	1	1	69.73	2.06
901	G G	2	52	22.5	1	1	1	2	2	53.86	1.11
902	G G	2	73	23.82	1	2	2	1	1	59.98	0.59
905	G G	1	73	23.74	2	1	2	1	1	40.04	0.71
922	G G	2	77	22.21	1	1	1	2	1	59.73	1.47
923	A G	2	62	19.67	1	1	2	1	1	46.03	0.77
924	A G	2	53	29.65	1	1	1	2	2	42.22	1.29
961	G G	1	68	25.27	2	1	1	1	2	64.57	0.53
962	G G	1	57	23.16	2	1	2	1	1	54.73	0.91
963	G G	2	48	24.12	1	1	1	1	1	50.78	1.08
964	G G	1	46	24.39	1	1	1	1	2	44.46	1.19
966	A G	2	68	25.79	1	2	2	1	2	48.36	1.36
969	G G	1	64	25.79	1	1	1	2	1	62.6	1.28
970	A G	1	46	25	1	1	1	1	1	67.53	1.77
972	A G	2	79	25.67	2	1	1	2	2	61.41	0.98
975	A G	2	79	21.87	2	1	2	1	1	45.19	1.44
979	G G	1	61	25.77	2	1	1	1	1	41.96	0.64
980	G G	1	75	25.35	1	1	1	1	1	44.9	1.83
983	G G	1	65	22.27	1	1	1	1	1	40.61	0.52
986	G G	2	85	22.4	1	2	1	1	1	61.21	0.59
988	A G	1	62	24.03	1	1	2	1	1	49.82	0.76
989	A G	1	53	25.37	1	1	1	1	2	40.46	0.86
990	A G	1	54	21.97	1	2	1	1	1	60.37	1.52
991	G G	2	55	24.05	2	1	2	1	2	39.19	0.72
992	A G	1	50	22.68	1	2	1	2	1	59.52	1.91
993	A G	2	82	23.73	1	1	2	2	1	51.41	1.08
997	A G	2	83	24.66	2	2	2	2	1	46.79	1

## Sheet: CAD (Replication set)
ID	rs2107595	Age	Sex (1=Male, 2=Female)	BMI	Smoking (1=No, 2=Yes)	Drinking (1=No, 2=Yes)	Hypertension (1=No, 2=Yes)	T2DM (1=No, 2=Yes)	Hyperlipidemia (1=No, 2=Yes)	Modified Gensini scores	CAD subtypes	Plasma HDAC9 (ng/mL)	HDAC9 mRNA expression (leukocytes)
21	G G	56	2	23.03	1	1	1	1	2	113	NSTEMI	43.17	0.68
91	A G	55	2	25.63	2	2	1	2	1	48	NSTEMI	39.81	0.95
100	A G	53	2	34.54	1	2	2	2	2	102	NSTEMI	56.12	1.09
101	A G	56	1	22.86	2	1	2	2	2	19.5	SAP	51.78	1.83
105	G G	57	1	32.66	1	1	1	1	2	11	SAP	53.99	1.75
106	G G	79	2	31.69	2	1	2	1	1	17	SAP	54.6	1.14
109	A A	57	2	34.89	2	1	2	1	1	89	NSTEMI	55.78	1.24
123	A A	87	2	25.65	2	2	2	1	1	119	NSTEMI	64.45	1.3
152	A A	81	2	28.5	2	2	2	1	1	111	STEMI	68.17	2.06
154	A G	60	1	23.03	1	1	1	1	1	10.5	UAP	69.03	0.97
156	G G	58	2	29.68	1	2	1	2	1	153	STEMI	53.75	0.86
157	G G	63	1	18.45	1	1	1	2	1	58.5	STEMI	50.64	1.3
159	G G	57	1	18.52	2	2	1	1	1	24	UAP	67.05	1.14
165	A G	81	1	23.72	2	2	2	2	2	126	STEMI	60.02	1.33
189	G G	58	2	24.66	1	2	2	1	1	30	SAP	57.07	1.29
191	G G	59	2	28.2	1	2	2	1	1	36	SAP	51.19	1.24
193	G G	78	1	23.39	1	2	2	1	2	71	NSTEMI	60.18	0.86
195	A G	56	2	26.78	2	2	2	1	1	20	UAP	50.29	1.45
215	G G	54	1	29.03	2	2	1	2	2	30	SAP	45.81	1.07
216	A G	66	1	18.49	1	2	2	1	2	9	SAP	56.21	1.81
223	A G	63	1	24.04	1	1	2	1	1	10.5	SAP	63.07	0.88
252	A G	54	1	27.33	1	1	1	1	2	6	UAP	59.93	1.12
265	G G	59	2	27.58	2	1	2	1	1	30	SAP	49.2	0.55
267	A A	76	2	24.26	1	1	2	1	1	30	SAP	44.05	1.11
279	A A	68	2	20.68	1	1	2	1	2	18	SAP	66.73	1.14
316	A G	55	2	24.84	2	1	2	1	1	21	SAP	49.36	1.48
342	A G	48	1	24.36	2	2	1	2	2	131	NSTEMI	61.17	1.06
346	A A	67	2	22	2	1	1	2	1	10.5	UAP	57.47	0.52
353	A G	77	2	20.68	1	1	1	1	1	37.5	STEMI	52.45	1.94
362	A G	83	2	28.04	1	1	1	2	1	12	SAP	46.03	0.52
364	G G	60	1	25.45	1	1	1	1	2	141	NSTEMI	60.96	1.39
365	G G	55	2	20.65	1	1	2	1	2	69	STEMI	59.87	1.2
366	A A	69	1	28.87	2	1	2	1	1	19.5	UAP	41.19	0.73
372	A G	61	2	20.46	1	1	1	1	1	15	UAP	60.95	1.22
374	G G	87	1	26.3	1	1	2	1	1	105	STEMI	35.89	1.21
379	A G	68	2	24.15	1	1	2	1	1	18	UAP	61.03	0.99
388	A G	54	1	27.91	2	2	1	2	2	21	SAP	44.2	1.42
402	A G	59	1	34.81	2	1	1	1	1	18	UAP	45.62	1.39
407	G G	72	1	25.65	1	1	2	1	1	19.5	UAP	42.36	1.26
408	G G	60	2	30.53	1	1	1	1	2	17	SAP	45.07	1.3
409	G G	53	1	25.77	2	1	2	1	2	23	SAP	72.04	0.63
426	G G	67	1	34.31	1	1	1	1	1	8	UAP	62	1.56
427	G G	54	2	20.68	1	1	2	1	1	69	STEMI	41.21	0.75
428	G G	69	1	21.29	1	1	1	1	1	15	UAP	42.54	1.74
447	G G	80	2	18.05	1	2	2	1	2	20	SAP	66.63	0.84
455	A G	71	1	20.93	2	1	2	1	1	66	STEMI	60.47	1.36
457	G G	61	1	29.28	1	1	2	1	2	9	UAP	64.11	1.26
462	A A	61	1	23.52	1	1	2	1	1	17	UAP	41.31	1.12
468	A G	55	2	20.77	1	1	2	1	1	9	SAP	52.97	1.59
470	G G	51	1	27.37	2	2	2	2	2	30	SAP	41.62	1.27
474	A A	60	2	29.82	1	1	1	1	2	10.5	SAP	36.05	1.7
480	A G	58	1	21.29	1	1	2	1	1	147	STEMI	52.02	1.53
520	G G	52	1	28.1	2	2	1	2	1	21	SAP	56.06	1.5
524	A A	62	2	24.28	2	2	1	2	1	113	NSTEMI	62.66	1.54
547	G G	77	2	28.97	2	2	1	1	1	30	SAP	66.85	0.61
549	G G	61	1	29.57	1	1	1	1	1	46.5	NSTEMI	50.16	0.58
552	A G	72	2	34.73	2	2	2	2	1	43.5	NSTEMI	66.7	1.65
559	G G	57	1	19.05	2	1	2	1	1	36	NSTEMI	53.86	0.58
560	A G	57	2	20.65	1	1	1	2	1	30	SAP	41.08	1.03
569	A G	86	2	26.18	1	2	2	1	2	18	SAP	50.14	1.81
570	G G	53	1	25.29	2	2	2	1	1	105	UAP	64.63	1.23
572	A G	53	1	23.09	2	2	2	1	2	18	SAP	36.98	1.3
577	G G	57	2	33.69	1	1	2	1	1	15	UAP	59	1.83
579	A G	58	2	20.65	1	2	1	1	2	129	STEMI	65.32	1.49
605	A G	79	2	26.81	1	1	2	1	1	66	NSTEMI	67.59	1.67
606	A G	57	1	22.24	1	1	2	2	1	46	UAP	61.26	0.97
609	A G	89	1	22.46	2	1	2	1	1	29	SAP	60.61	0.76
615	G G	57	1	27.84	1	1	1	1	1	11	SAP	50.69	1.13
616	A G	56	1	23.7	1	2	1	1	1	30	NSTEMI	59.15	1.72
622	A A	60	1	27.65	1	1	2	1	1	12	SAP	41.62	0.99
628	A G	62	2	33.55	1	1	2	1	1	122	STEMI	59.13	1.4
630	G G	55	1	30.25	1	1	2	2	1	102	UAP	51.27	1.61
642	A G	74	1	26.21	1	1	1	2	2	21	SAP	45.08	0.82
653	A A	55	2	25.73	2	1	2	2	1	16.5	UAP	53.8	1.55
656	G G	72	1	25.26	1	2	1	2	1	19.5	UAP	38.08	0.73
657	A G	83	2	25.45	2	1	2	1	1	10.5	SAP	66.92	0.97
660	A G	55	2	24.93	2	1	2	2	1	20	SAP	71.75	1.5
666	G G	41	2	19.49	2	1	2	1	1	19.5	UAP	46.63	1.81
667	A G	67	2	27.79	1	1	2	1	1	12	UAP	46.84	1.65
677	G G	77	1	24.49	1	1	1	2	2	16.5	UAP	62.18	0.79
688	A G	63	2	21.07	1	2	2	2	1	106.5	STEMI	50.3	1.38
716	A G	61	1	25.13	1	1	1	1	1	42	STEMI	46.21	1.21
717	A G	73	1	28.25	1	1	2	1	2	12	SAP	40.32	1.21
720	G G	73	1	21.82	2	1	1	2	1	105	NSTEMI	44.86	0.6
721	A G	77	2	20.28	2	1	1	2	2	90	STEMI	68.67	1.36
726	A G	57	2	27.24	2	1	1	2	1	87	NSTEMI	68.93	1.69
731	G G	51	1	22.8	2	2	1	2	1	81	NSTEMI	46.21	0.79
756	A G	68	1	24.06	1	1	1	1	1	18	UAP	40.36	1.63
757	A A	57	1	19.7	2	1	2	1	2	93	NSTEMI	65.4	2.12
760	G G	63	2	25.45	1	2	2	2	1	23	SAP	42.68	1.62
763	A A	84	1	23.86	2	1	2	1	2	85.5	STEMI	60.48	2.11
777	G G	54	1	24.37	1	1	2	1	1	18	UAP	37.66	0.53
785	A A	68	1	24.99	1	1	2	2	1	33	UAP	56.42	1.03
788	G G	53	1	18.63	1	1	1	1	2	36	NSTEMI	48.32	0.92
793	A G	62	2	25.37	1	1	1	1	2	10.5	SAP	41.17	1.36
802	A G	72	1	25.97	1	1	2	1	1	15	SAP	52.12	0.64
811	G G	75	2	21.28	2	1	2	1	1	18	UAP	61.19	1.33
820	A G	72	2	27.99	1	1	2	1	1	23	SAP	70.56	1.12
833	G G	72	2	23.86	1	2	2	2	1	127.5	NSTEMI	48.67	1.87
836	A G	64	1	25.44	1	2	1	1	1	108	STEMI	63.83	1.57
837	A G	55	1	31.98	1	1	1	1	1	12	SAP	40.26	1.04
847	G G	79	2	27.01	2	2	2	1	1	132	NSTEMI	50.29	1.19
862	A G	56	1	20.88	2	2	1	2	2	31	SAP	41.9	0.55
870	A A	65	1	31.82	1	2	2	2	2	33	UAP	56.78	1.86
874	G G	81	1	30.87	2	1	1	1	1	19.5	SAP	59.3	1.82
876	G G	76	2	34.38	2	1	2	2	1	38	SAP	51.12	1.12
879	A G	57	1	24.66	2	1	2	2	1	20	UAP	61.2	0.83
885	A G	81	2	30.5	2	1	2	1	1	69	STEMI	69.33	1.17
886	A A	51	1	23.19	1	2	2	1	1	76.5	NSTEMI	61.64	1.59
891	A G	54	2	25.68	2	2	2	2	1	155	NSTEMI	65.45	1.74
894	G G	43	1	33.81	1	2	1	2	1	31	SAP	46.46	0.86
899	A A	64	2	27.24	2	2	2	2	2	84	SAP	46.93	0.91
900	A G	58	1	19.36	2	1	2	2	1	94.5	SAP	48.12	1.01
902	A G	71	1	27.99	1	1	1	1	1	18	SAP	71.69	0.89
906	A G	72	1	24.46	1	1	2	2	1	19.5	UAP	40.92	0.52
911	G G	72	1	34.03	1	1	2	1	2	14	UAP	74.33	0.69
921	A A	57	1	34.34	2	2	2	1	1	31	NSTEMI	59.74	1.53
926	G G	61	1	21.71	2	1	2	1	2	23	UAP	36.59	0.58
934	G G	78	2	18.1	1	1	2	1	1	11	UAP	45.1	0.63
941	A G	47	2	25.06	1	1	2	1	1	144	STEMI	68.04	0.89
944	G G	67	2	21.08	2	2	1	2	2	30	STEMI	56.79	0.59
956	A A	66	2	28.99	1	1	2	1	1	30	STEMI	54	1.39
957	G G	58	1	18.68	1	2	2	2	1	104	UAP	44.7	0.88
1000	A A	56	2	30.37	1	1	2	1	1	20	SAP	66.58	0.63
1010	A G	68	2	34.42	1	1	2	1	1	68	NSTEMI	53.33	1.15
